# Supplementary material for: Selective recognition of carbonic anhydrase using transition metal complexes
Source: Royal Society of Chemistry journal article supplement (doi:10.1039/a909001k), 2000-01-01

*Supplementary Materials for*

**Selective Recognition of Carbonic Anhydrase Using  
Transition Metal Complexes**

Bidhan C. Roy, Md. Abul Fazal, Shuguang Sun and Sanku Mallik\*

Department of Chemistry, North Dakota State University

Fargo, ND 58105

Tel: 701-231-8829, Fax: 701-231-8831

E-mail: [sanku\\_mallik@ndsu.nodak.edu](mailto:sanku_mallik@ndsu.nodak.edu)

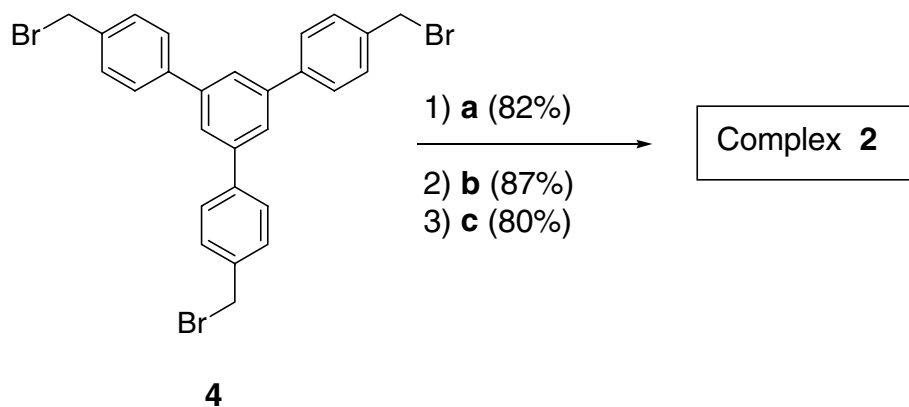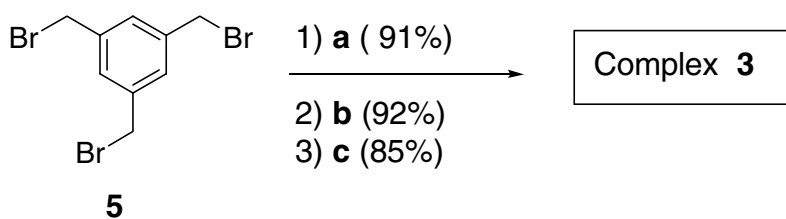

Reagents and conditions. **a**:  $\text{HN}(\text{CH}_2\text{CO}_2\text{Et})_2$  (3 eq.),  $\text{K}_2\text{CO}_3$  (10 eq.),  $\text{CH}_3\text{CN}$   
 Sonication, 24 h. **b**:  $\text{LiOH}$  (9 eq.),  $\text{MeOH-THF}$ ,  $25^\circ\text{C}$ , 15 h then  $\text{H}_3\text{O}^+$  (pH = 3.0)  
**c**:  $\text{CuCl}_2 \cdot 2\text{H}_2\text{O}$  (3 eq.),  $\text{MeOH-H}_2\text{O}$ ,  $25^\circ\text{C}$ , 3h

**Scheme** for the synthesis of the metal complexes **2** and **3**.

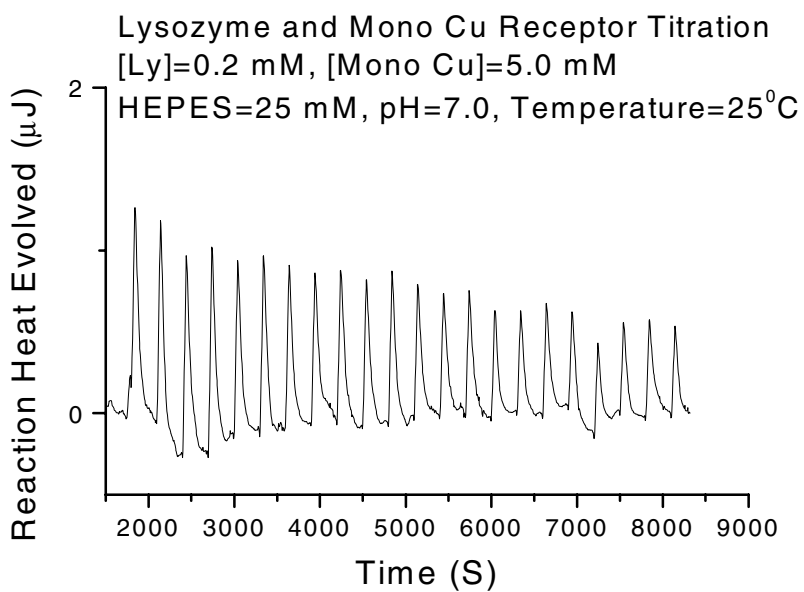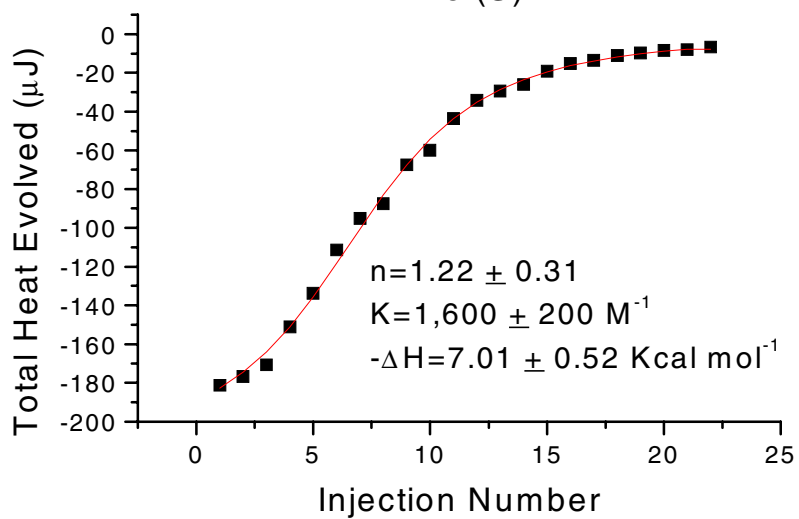

Carbonic Anhydrase and Mono Cu Receptor Titration

[CA]=0.1 mM, [m-Cu]=1.6 mM

HEPES=25 mM, pH=7.0, Temperature=25 °C

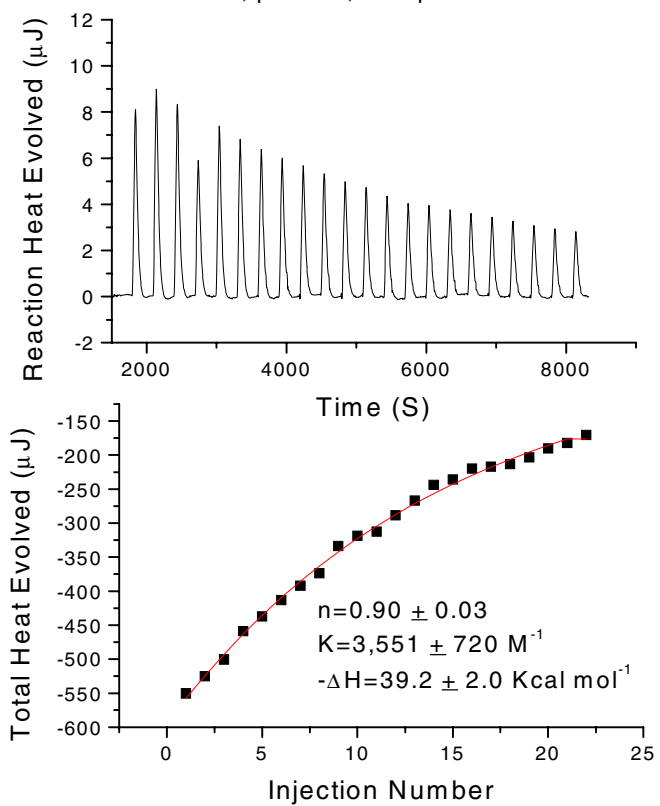

Carbonic Anhydrase and  
Tetraphenyl Cu Receptor Titration  
[CA]=0.12 mM, [Tetraphenyl Cu]=1.0 mM  
HEPES=25 mM, pH=7.0, Temperature=25°C

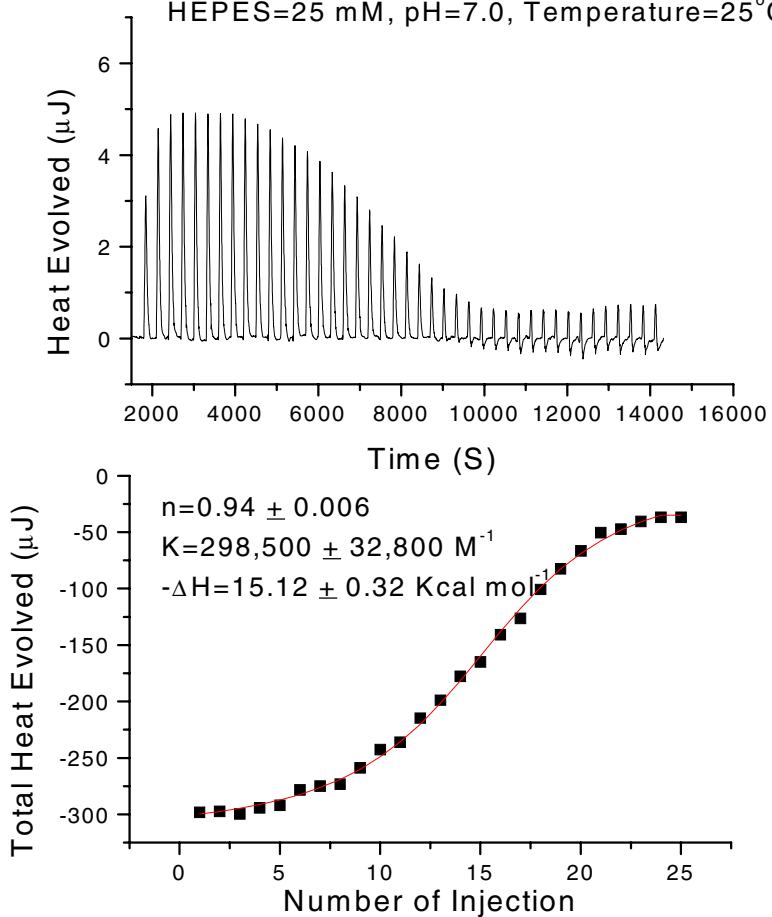

Carbonic Anhydrase and  
Tetraphenyl Cu Receptor Titration  
[CA]=0.125 mM, [Tetraphenyl Cu]=1.0 mM  
HEPES=25 mM, pH=6.0, Temperature=25°C

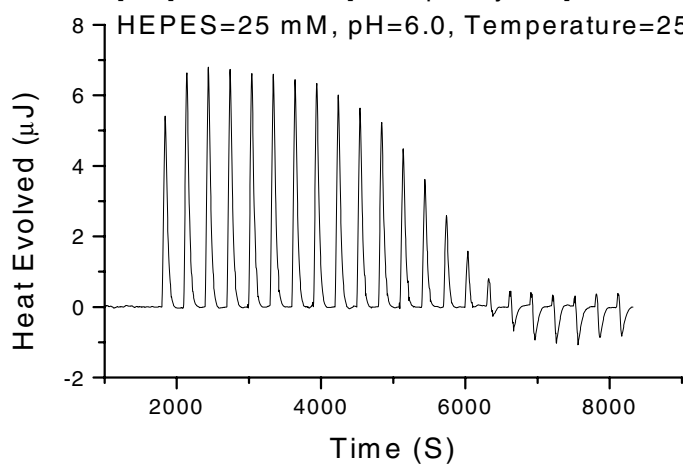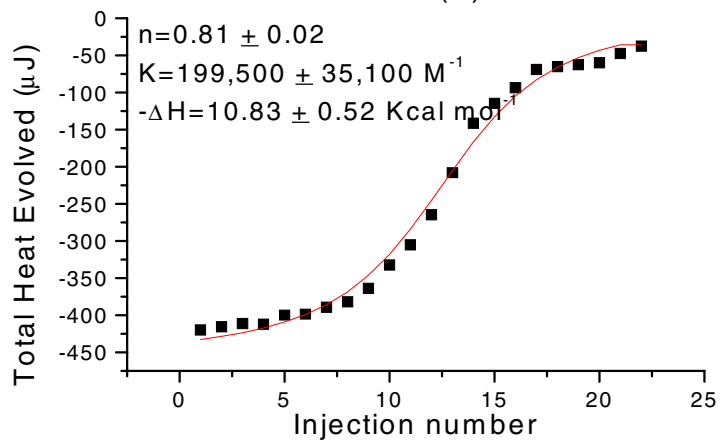

Carbonic Anhydrase and Tris Cu Receptor Titration  
[CA]=0.1 mM [Tris-Cu]=1.5 mM  
HEPES=25 mM, pH=8.0, Temperature=25°C

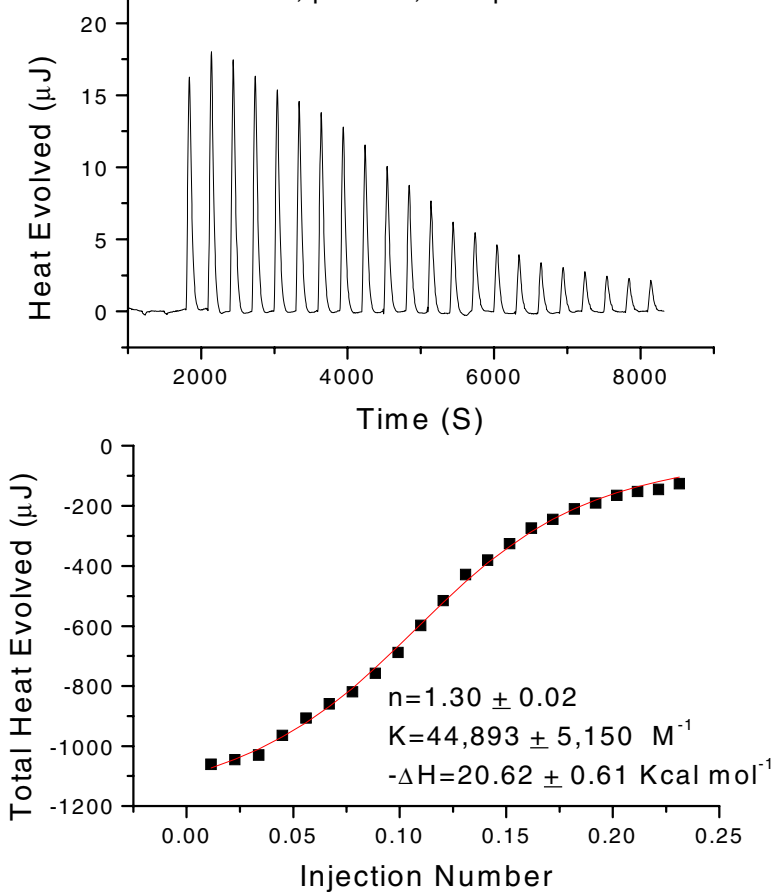

Carbonic Anhydrase and Tris Cu Receptor Titration

[CA]=0.2 mM, [Tris Cu]=2.5 mM

HEPES=25 mM, pH=7.0, Temperature=25°C

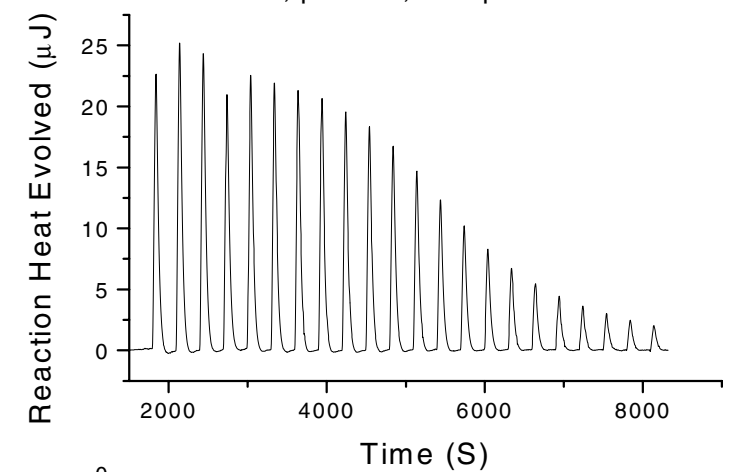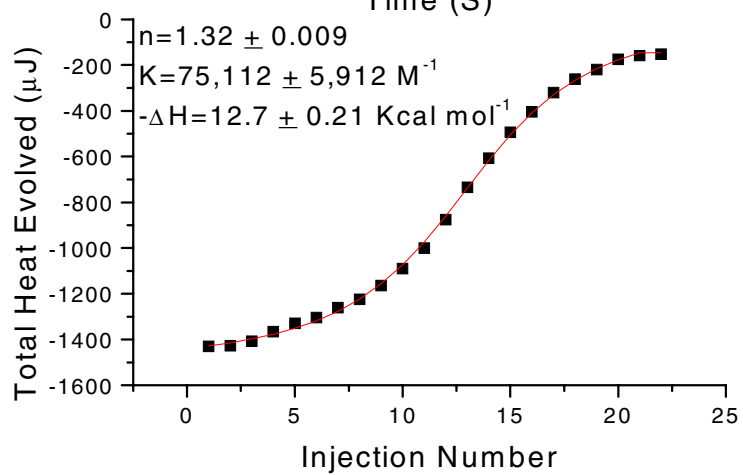



Carbonic Anhydrase and Tris Cu Receptor Titration  
[CA]=0.1 mM, [Tris Cu]=1.5 mM  
HEPES=25 mM, pH=6.0, Temperature=25°C

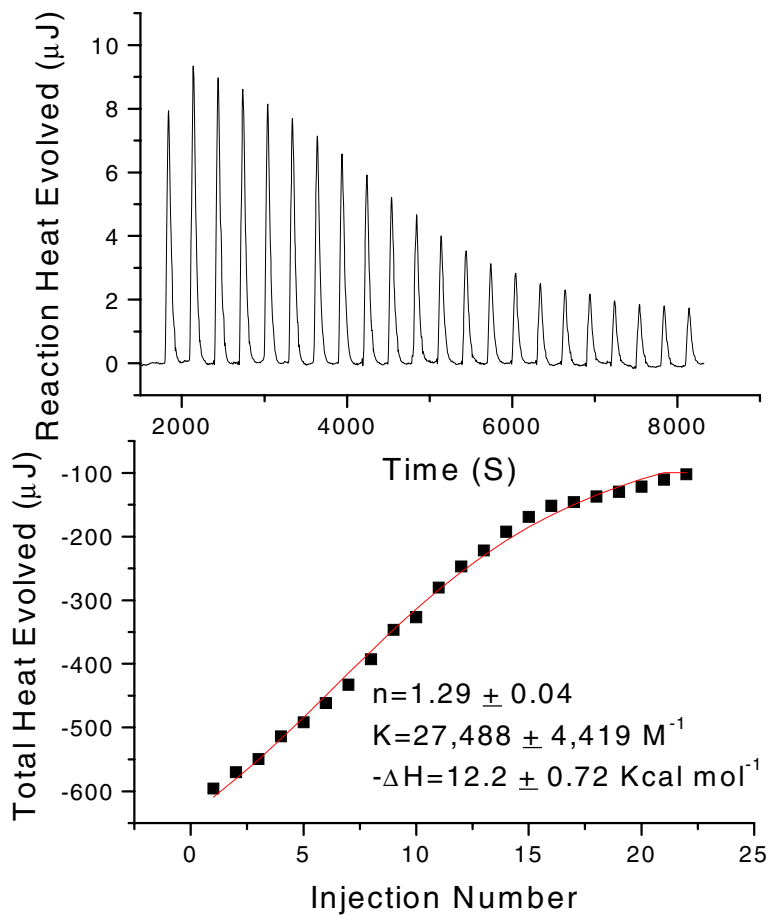

Carbonic Anhydrase and Tris Cu Receptor Titration  
[CA]=0.1 mM [Tris-Cu]=1.5 mM  
HEPES=25 mM, pH=8.0, Temperature=25°C

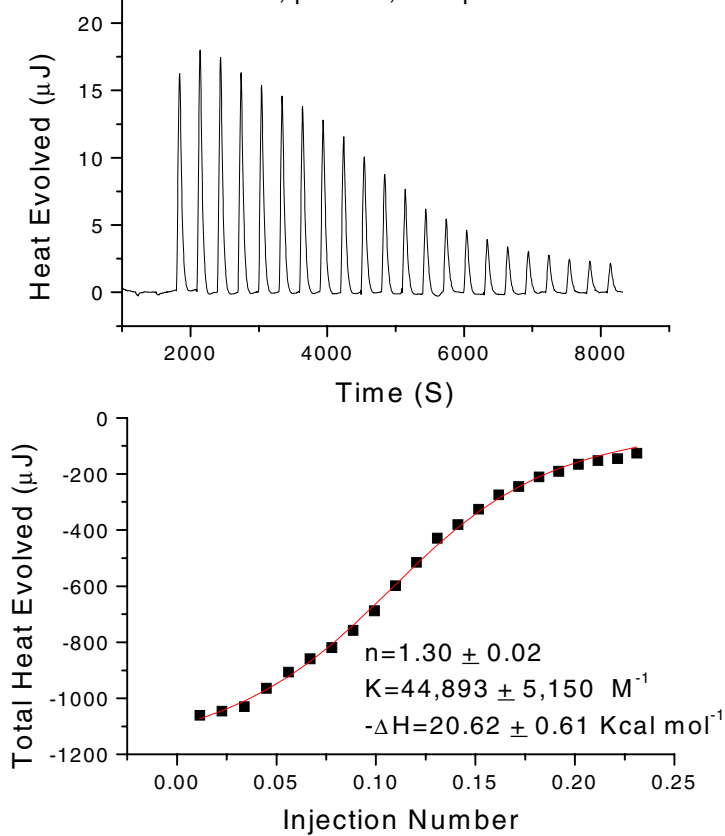

Chicken Egg Albumin and Tris Cu Receptor Titration

[CEA]=0.1 mM, [Tris Cu]=2.0 mM

HEPES=25 mM, pH=7.0, Temperature=25°C

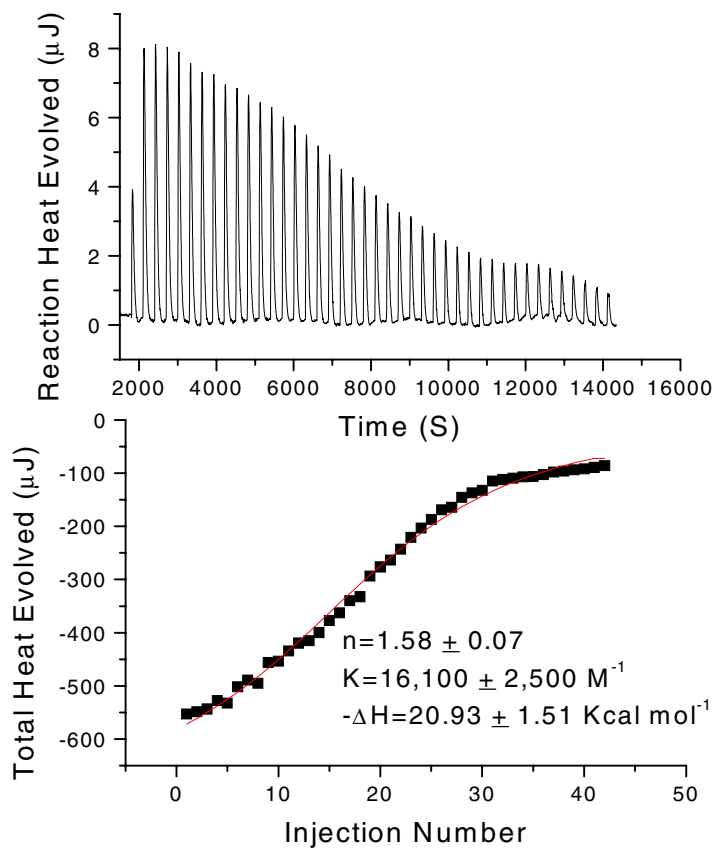

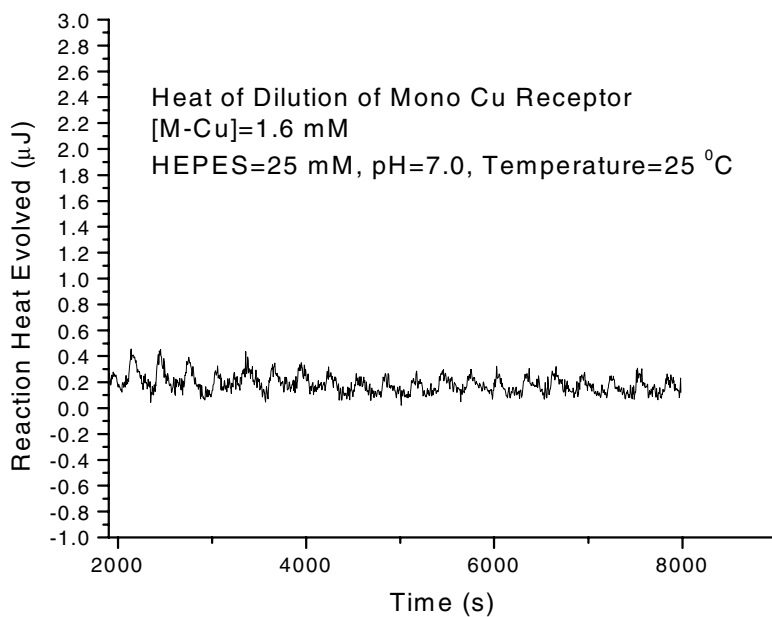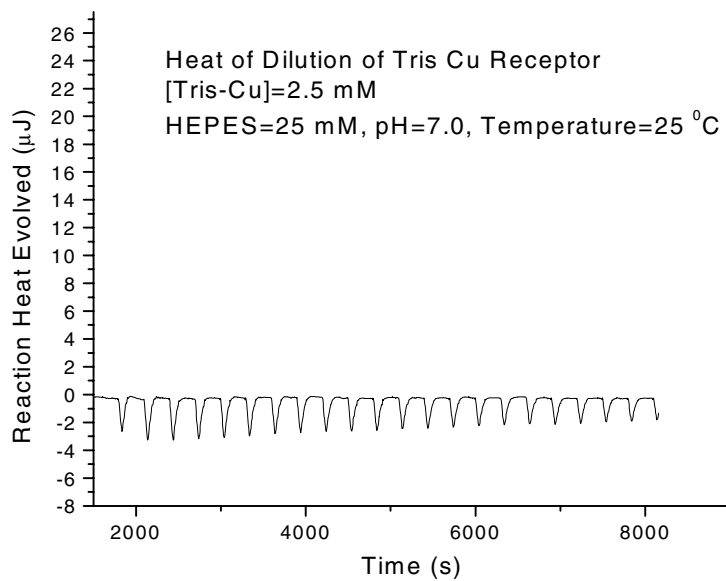

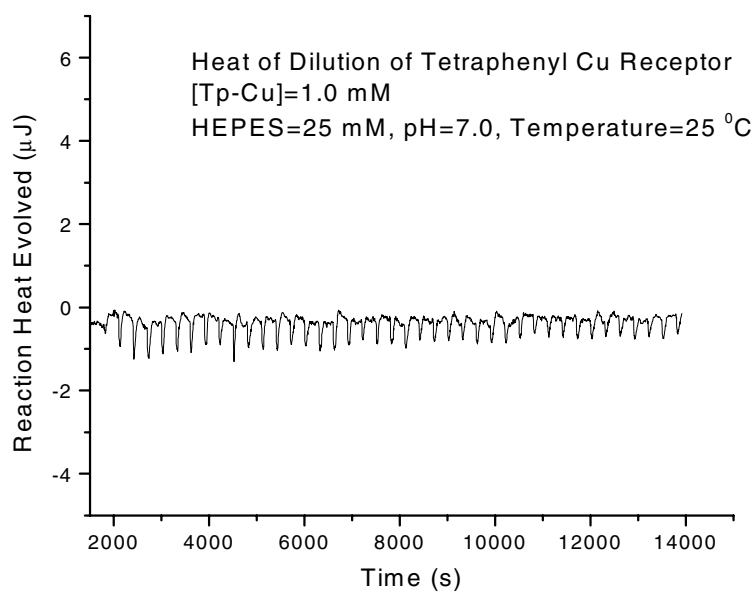

Supplement: a909001k.pdf [file a909001k.pdf]
